# Supplementary material for: Three-dimensional fluorescent microscopy via simultaneous illumination and detection at multiple planes
Source: PubMed Central journal article supplement (PMC4985622; doi:10.1038/srep31445), 2016-08-16
Supplement: srep31445-s1.pdf [file srep31445-s1.pdf]

# Three-dimensional fluorescent microscopy via simultaneous illumination and detection at multiple planes

Qian Ma<sup>1</sup>, Bahar Khademhosseini<sup>1</sup>, Eric Huang<sup>2</sup>, Haoliang Qian<sup>1</sup>, Malina A. Bakowski<sup>3</sup>, Emily R. Troemel<sup>3</sup>,  
and Zhaowei Liu<sup>1,†</sup>

<sup>1</sup>Department of Electrical and Computer Engineering, University of California, San Diego,

<sup>2</sup>Department of Physics, University of California, San Diego

<sup>3</sup>Division of Biological Sciences, University of California, San Diego,

9500 Gilman Drive, La Jolla, California 92093, USA

<sup>†</sup>Corresponding author email address: zhaowei@ucsd.edu

## Supplementary Figures

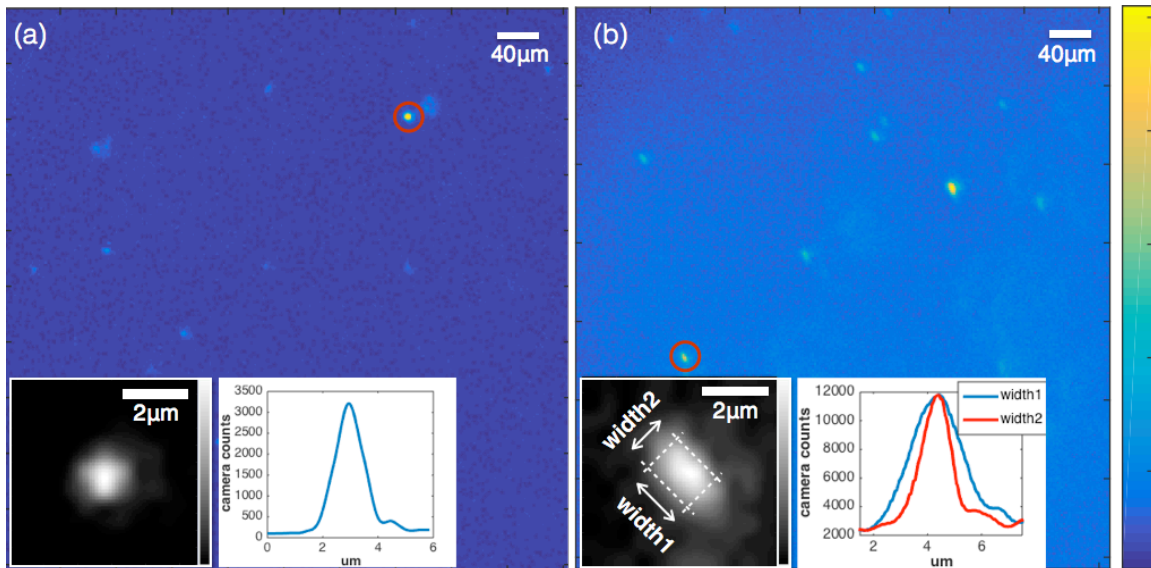

**Supplementary Figure 1.** Image with NA limited resolution. Imaged sample: 200nm fluorescent beads sparsely distributed in Agar. Pixel size at sample plane: 0.528  $\mu\text{m}$ . Objective lens: Zeiss, 10X/0.3. (a) Camera Image, zoom in image and its cross section without MFG. Both zoom in image and its cross-section are interpolated. Measured FWHM: 1.27  $\mu\text{m}$ . (b) Camera Image, zoom in image and its cross section with MFG. Both zoom in image and its cross-section are interpolated. Measured FWHM: Width 1 is 2.22  $\mu\text{m}$ . Width 2 is 1.32  $\mu\text{m}$ .

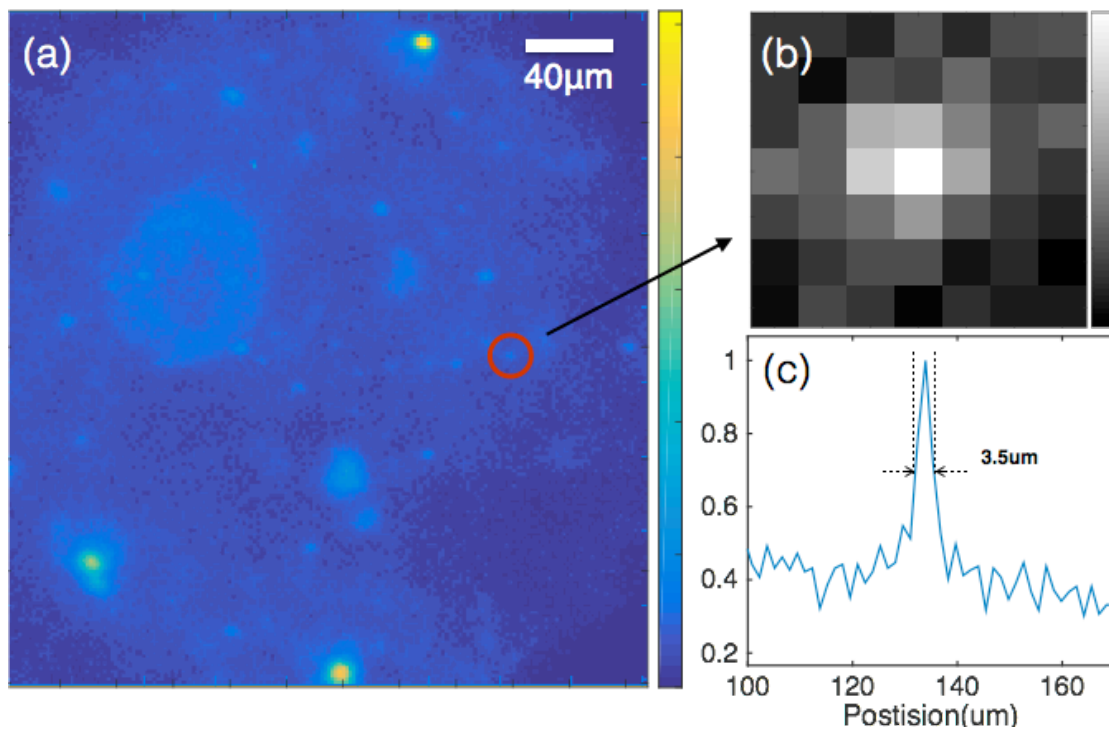

**Supplementary Figure 2.** Image with Camera pixel size limited resolution. (a) Raw image from the same data set as figure 3 and figure 4 in the manuscripts. Pixel size at sample plane: 1.44  $\mu\text{m}$ ; Imaged sample: Mixed 10  $\mu\text{m}$  and 500 nm fluorescent beads in PDMS. (b) Magnified image of a single bead. (c) Cross section of a single bead image.
